# Supplementary material
Source: PubMed Central journal article supplement (PMC5934555)
Supplement: ajcr0008-0650-f8.pdf [file ajcr0008-0650-f8.pdf]

## GGCT knockdown induces autophagy followed by senescence

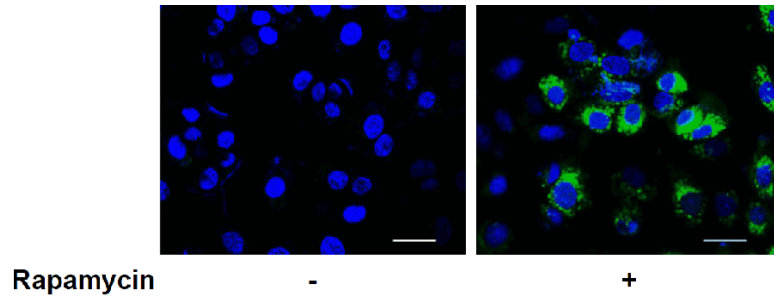

**Supplementary Figure 1.** A positive control for detection of autophagosomes. Representative images of MCF7 cells treated with an autophagy inducer Rapamycin (500 nM for 18 hours) are shown. Scale bar, 20  $\mu$ m.

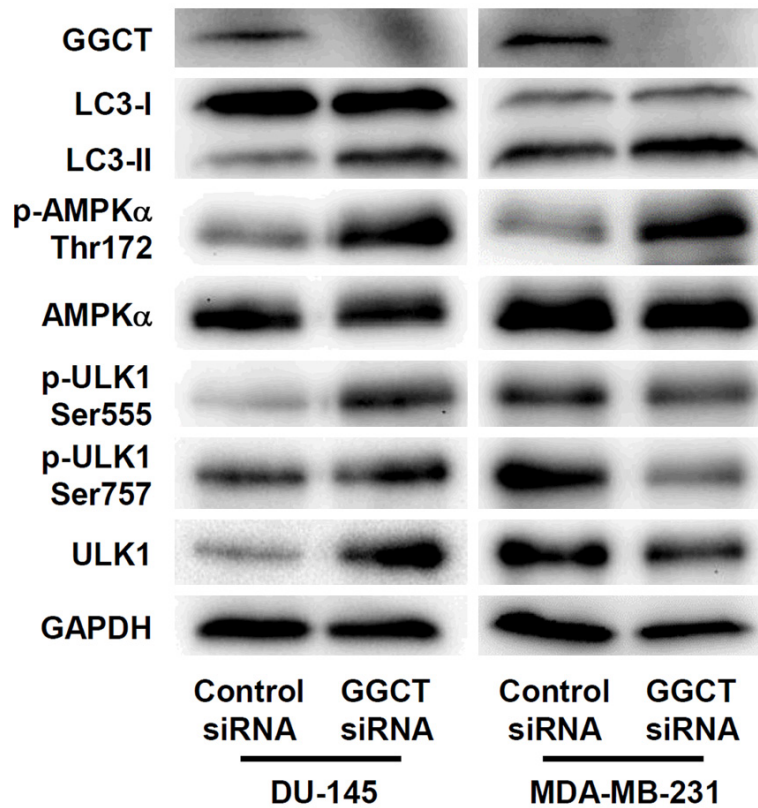

**Supplementary Figure 2.** Western blot analyses of mediators of the AMPK-ULK1 signaling pathway (p-AMPK $\alpha$  Thr172, AMPK $\alpha$ , p-ULK1 Ser555, and ULK1) and downstream components of the mTORC1 pathway p-ULK1 Ser757 in DU-145 prostate cancer and MDA-MB-231 breast cancer cells 6 days post-transfection with siRNA targeting GGCT or with a non-target control siRNA. GAPDH are shown as loading controls.
